# Supplementary material for: Genome-wide association study of sugar content and development of diagnostic KASP markers in peanut (Arachis hypogaea L.)
Source: Research Square preprint supplement (doi:10.21203/rs.3.rs-8599999/v1), 2026-02-10
Supplement: Supplementary file 1 [file a852fee2ee9bb775e794dc09.xlsx]

## Sheet: Table S1
Table S1 SNPs information related to traits.
Environment	Trait	Marker	Chromosome	Position(bp)	P-value	-1og10(p)	R2(%)
2022BD	TSC	AX-176812721	A10	60572663	0.000967	3.16	13.76
2022BD	TSC	AX-177641313	A10	65832524	0.000948	3.36	13.8
2022BD	TSC	AX-176802898	A10	9376311	0.000845	3.01	14
2022BD	TSC	AX-176791909	A10	46609465	0.000789	3.01	14.13
2022BD	TSC	AX-176800709	A10	10380686	0.000216	3.02	16.29
2022BD	TSC	AX-177638665	A10	46812320	0.000215	3.07	16.61
2022BD	TSC	AX-147246011	B03	131166931	0.000458	3.1	12.22
2022BD	TSC	AX-176801875	B03	1536039	0.000363	3.66	12.62
2022BD	TSC	AX-176817022	B03	133430763	0.00013	3.67	14.37
2022BD	TSC	AX-147248847	B04	131445649	0.000563	3.34	15.08
2022BD	TSC	AX-176817250	B04	109897705	0.000551	3.44	15.06
2022BD	TSC	AX-147248852	B04	131451334	0.000453	3.89	15.3
2022BD	TSC	AX-147248838	B04	131309106	0.000383	3.25	15.42
2022BD	TSC	AX-176812929	B04	26863781	0.000339	3.26	16.38
2022BD	TSC	AX-147248854	B04	131462529	0.000256	3.34	16.56
2022BD	TSC	AX-176791380	B04	131369085	0.000211	3.42	16.48
2022BD	TSC	AX-147248853	B04	131451694	0.000211	3.47	16.48
2022BD	TSC	AX-176795330	B04	8969353	0.000122	3.59	14.47
2022BD	TSC	AX-176813712	B04	9074346	0.000122	3.68	14.47
2022BD	TSC	AX-176817073	B04	10046248	0.000122	4.35	14.47
2022BD	TSC	AX-176809746	B04	10408809	0.000122	4.54	14.47
2023BD	TSC	AX-147221332	A04	121110175	2.86e-05	4.54	20.55
2023BD	TSC	AX-147221357	A04	121155485	4.49e-05	4.35	19.5
2023BD	TSC	AX-176813040	A02	13677636	5.61e-05	4.25	19.12
2023BD	TSC	AX-176822492	A04	121139104	8.9e-05	4.05	18.53
2023BD	TSC	AX-176792716	A06	66854865	8.93e-05	4.05	15.16
2023BD	TSC	AX-176812961	A04	3782868	0.000102	3.99	15.06
2023BD	TSC	AX-176803912	A05	82902394	0.000122	3.91	14.47
2023BD	TSC	AX-176802473	A05	107111135	0.000122	3.91	14.47
2023BD	TSC	AX-176806273	A05	107111384	0.000122	3.91	14.47
2023BD	TSC	AX-176799383	A06	18834938	0.000122	3.91	14.47
2023BD	TSC	AX-176800440	A06	20793506	0.000122	3.91	14.47
2023BD	TSC	AX-176792611	A06	60358399	0.000122	3.91	14.47
2023BD	TSC	AX-176809906	A06	75065245	0.000122	3.91	14.47
2023BD	TSC	AX-176815081	A06	84014448	0.000122	3.91	14.47
2023BD	TSC	AX-176808519	A06	84136340	0.000122	3.91	14.47
2023BD	TSC	AX-176802474	A06	87836392	0.000122	3.91	14.47
2023BD	TSC	AX-176815105	A06	89814572	0.000122	3.91	14.47
2023BD	TSC	AX-176795330	B04	8969353	0.000122	3.91	14.47
2023BD	TSC	AX-176813712	B04	9074346	0.000122	3.91	14.47
2023BD	TSC	AX-176817073	B04	10046248	0.000122	3.91	14.47
2023BD	TSC	AX-176809746	B04	10408809	0.000122	3.91	14.47
2023BD	TSC	AX-176817503	B05	143810855	0.000122	3.91	14.47
2023BD	TSC	AX-176817822	B06	27558550	0.000122	3.91	14.47
2023BD	TSC	AX-176806685	B06	39687661	0.000122	3.91	14.47
2023BD	TSC	AX-176818502	B06	87007993	0.000122	3.91	14.47
2023BD	TSC	AX-176812904	B06	108893279	0.000122	3.91	14.47
2023BD	TSC	AX-176817022	B03	133430763	0.00013	3.89	14.37
2023BD	TSC	AX-147221340	A04	121123731	0.000152	3.82	17.28
2023BD	TSC	AX-147221354	A04	121149943	0.000152	3.82	17.28
2023BD	TSC	AX-176792023	A04	121138663	0.000211	3.68	16.48
2023BD	TSC	AX-176791380	B04	131369085	0.000211	3.68	16.48
2023BD	TSC	AX-147248853	B04	131451694	0.000211	3.68	16.48
2023BD	TSC	AX-177638665	B00	46812320	0.000215	3.67	16.61
2023BD	TSC	AX-176800709	B00	10380686	0.000216	3.66	16.29
2023BD	TSC	AX-147248854	B04	131462529	0.000256	3.59	16.56
2023BD	TSC	AX-147221361	A04	121182715	0.000277	3.56	16
2023BD	TSC	AX-147221333	A04	121110746	0.000301	3.52	16.27
2023BD	TSC	AX-176812929	B04	26863781	0.000339	3.47	16.38
2023BD	TSC	AX-176801875	B03	1536039	0.000363	3.44	12.62
2023BD	TSC	AX-147221331	A04	121067694	0.000383	3.42	15.42
2023BD	TSC	AX-147248838	B04	131309106	0.000383	3.42	15.42
2023BD	TSC	AX-147221334	A04	121111105	0.000412	3.39	15.48
2023BD	TSC	AX-147221335	A04	121111431	0.000412	3.39	15.48
2023BD	TSC	AX-176799262	A04	121138420	0.000412	3.39	15.48
2023BD	TSC	AX-176803972	A07	4062405	0.000435	3.36	15.2
2023BD	TSC	AX-147248852	B04	131451334	0.000453	3.34	15.3
2023BD	TSC	AX-176799417	A03	124120341	0.000458	3.34	12.22
2023BD	TSC	AX-176811668	A05	91845257	0.000458	3.34	12.22
2023BD	TSC	AX-147246011	B03	131166931	0.000458	3.34	12.22
2023BD	TSC	AX-176817250	B04	109897705	0.000551	3.26	15.06
2023BD	TSC	AX-147248847	B04	131445649	0.000563	3.25	15.08
2023BD	TSC	AX-176795738	A05	90284071	0.000652	3.19	14.47
2023BD	TSC	AX-176801567	A06	107375315	0.000652	3.19	14.47
2023BD	TSC	AX-176805374	A06	109233745	0.000652	3.19	14.47
2023BD	TSC	AX-176792933	A04	112982843	0.000689	3.16	11.51
2023BD	TSC	AX-176813190	A07	11766998	0.000695	3.16	14.83
2023BD	TSC	AX-176822400	B10	117665905	0.000734	3.13	11.61
2023BD	TSC	AX-176791909	A10	46609465	0.000789	3.1	14.13
2023BD	TSC	AX-177637732	B10	35189192	0.000789	3.1	14.13
2023BD	TSC	AX-177639571	B10	93388560	0.000789	3.1	14.13
2023BD	TSC	AX-176802898	A10	9376311	0.000845	3.07	14
2023BD	TSC	AX-176795169	A04	120860860	0.000858	3.07	11.52
2023BD	TSC	AX-176814482	A07	11595086	0.000871	3.06	13.95
2023BD	TSC	AX-147214849	A02	85968856	0.000906	3.04	14.24
2023BD	TSC	AX-176795701	A05	106765200	0.000909	3.04	11.12
2023BD	TSC	AX-177641313	A10	65832524	0.000948	3.02	13.8
2023BD	TSC	AX-176819485	B10	26556349	0.000948	3.02	13.8
2023BD	TSC	AX-177638994	B10	28559864	0.000948	3.02	13.8
2023BD	TSC	AX-177638070	B10	88945497	0.000948	3.02	13.8
2023BD	TSC	AX-176820205	A05	106743542	0.000954	3.02	11.17
2023BD	TSC	AX-147254697	B07	4464714	0.000957	3.02	13.78
2023BD	TSC	AX-147235715	A10	25001885	0.000967	3.01	13.76
2023BD	TSC	AX-176812721	A10	60572663	0.000967	3.01	13.76
2023BD	TSC	AX-176822436	B06	20753932	0.000967	3.01	13.76
2023BD	TSC	AX-176819620	A07	11646332	0.000995	3	13.71
2023BD	TSC	AX-177637851	B10	86893855	0.000998	3	13.87
2023BD	TSC	AX-177642263	B08	125505318	0.00101	3	10.84
2021BD	SSC	AX-176810022	B05	145958219	0.000442	3.35	11.86
2022BD	SSC	AX-147238133	B01	16193083	0.000928	3.03	9.54
2022BD	SSC	AX-176823647	A09	101501122	0.000637	3.2	10.22
2022BD	SSC	AX-176821657	B03	24950682	0.000395	3.4	10.93
2022BD	SSC	AX-176799326	A01	87316516	0.000355	3.45	11.09
2022BD	SSC	AX-177638591	A09	12269728	0.000355	3.45	11.09
2022BD	SSC	AX-176795690	A09	20920879	0.000355	3.45	11.09
2022BD	SSC	AX-177637100	B09	50876315	0.000355	3.45	11.09
2022BD	SSC	AX-177637529	B09	114538491	0.00034	3.47	11.23
2022BD	SSC	AX-147232622	A09	8102594	0.000983	3.01	11.91
2022BD	SSC	AX-177639689	B09	9776423	0.000983	3.01	11.91
2022BD	SSC	AX-176821479	A02	11111749	0.000851	3.07	12.14
2022BD	SSC	AX-177637356	A09	64224992	0.000167	3.78	12.21
2022BD	SSC	AX-177639354	A09	67863464	0.000167	3.78	12.21
2022BD	SSC	AX-177637318	A09	69109506	0.000167	3.78	12.21
2022BD	SSC	AX-177637920	A09	99904022	0.000167	3.78	12.21
2022BD	SSC	AX-177644605	B09	83096824	0.000167	3.78	12.21
2022BD	SSC	AX-176809485	A09	7801972	0.000853	3.07	12.26
2022BD	SSC	AX-177642629	B10	134634720	0.000135	3.87	12.4
2022BD	SSC	AX-177639915	A09	14598936	0.000112	3.95	12.96
2023BD	SSC	AX-176803727	A01	104432577	0.0009	3.05	9.81
2023BD	SSC	AX-176810658	A01	94535260	0.000798	3.1	12.54
2023BD	SSC	AX-176808149	A01	103104641	0.000737	3.13	12.98
2023BD	SSC	AX-176809573	A01	102627425	0.000734	3.13	12.95
2023BD	SSC	AX-176813061	A01	102674864	0.000534	3.27	13.19
2023BD	SSC	AX-176821913	A02	35976979	0.000182	3.74	15.06
2023BD	SSC	AX-176811128	A02	4713794	4.89e-05	4.31	16.94
2023BD	SSC	AX-176812836	A03	110850153	0.000798	3.1	12.54
2023BD	SSC	AX-176796623	A03	111286594	0.000798	3.1	12.54
2023BD	SSC	AX-176815198	A03	118212397	0.000798	3.1	12.54
2023BD	SSC	AX-176814446	A03	108913899	0.000667	3.18	13.52
2023BD	SSC	AX-176804778	A03	131068291	5.62e-05	4.25	16.72
2023BD	SSC	AX-176807996	A04	15533403	0.00071	3.15	12.86
2023BD	SSC	AX-176818115	A04	109700600	0.000518	3.29	10.67
2023BD	SSC	AX-176806524	A04	109064753	0.000501	3.3	10.72
2023BD	SSC	AX-147223187	A05	91190516	0.00101	3	12.15
2023BD	SSC	AX-176795337	A05	91503628	0.00101	3	12.15
2023BD	SSC	AX-176793927	A05	100510772	0.000206	3.69	15.09
2023BD	SSC	AX-147221640	A05	7050613	6.21e-05	4.21	16.57
2023BD	SSC	AX-147229086	A07	77756346	0.000843	3.07	12.45
2023BD	SSC	AX-147228775	A07	70918642	0.000449	3.35	13.47
2023BD	SSC	AX-147227313	A07	4557076	0.000137	3.86	15.35
2023BD	SSC	AX-177640540	A07	66231465	2.29e-05	4.64	15.53
2023BD	SSC	AX-177638808	A08	37948238	0.000843	3.07	12.45
2023BD	SSC	AX-176815388	A08	44888104	0.000189	3.72	15.27
2023BD	SSC	AX-147234743	A09	118600614	0.000775	3.11	12.59
2023BD	SSC	AX-176816665	B02	77163518	0.00099	3	12.32
2023BD	SSC	AX-176823279	B02	67403095	0.000372	3.43	14.08
2023BD	SSC	AX-176821215	B02	34009224	0.000349	3.46	14.17
2023BD	SSC	AX-147241398	B02	58924091	0.000182	3.74	15.06
2023BD	SSC	AX-147241257	B02	35319573	0.000165	3.78	15.06
2023BD	SSC	AX-176816657	B02	70555263	0.000165	3.78	15.06
2023BD	SSC	AX-176801699	B02	5891590	0.000126	3.9	15.81
2023BD	SSC	AX-176816982	B03	112972686	0.000946	3.02	12.5
2023BD	SSC	AX-176816968	B03	108307340	0.000798	3.1	12.54
2023BD	SSC	AX-176805505	B03	108820416	0.000798	3.1	12.54
2023BD	SSC	AX-176805573	B03	108848601	0.000798	3.1	12.54
2023BD	SSC	AX-176816976	B03	111152299	0.000798	3.1	12.54
2023BD	SSC	AX-147245026	B03	111893493	0.000798	3.1	12.54
2023BD	SSC	AX-176809140	B03	112348375	0.000798	3.1	12.54
2023BD	SSC	AX-176808039	B03	117920877	0.000798	3.1	12.54
2023BD	SSC	AX-176818776	B03	115500602	0.000788	3.1	12.56
2023BD	SSC	AX-176819713	B03	113251004	0.00071	3.15	12.86
2023BD	SSC	AX-147245084	B03	114934705	0.000652	3.19	12.87
2023BD	SSC	AX-176800122	B03	114451479	0.000427	3.37	13.63
2023BD	SSC	AX-176791846	B05	137703212	0.00101	3	12.15
2023BD	SSC	AX-176811558	B05	134651263	0.000851	3.07	12.44
2023BD	SSC	AX-176822996	B06	17978115	0.000242	3.62	14.45
2023BD	SSC	AX-176823281	B06	17435324	0.000143	3.84	12.63
2023BD	SSC	AX-147252883	B06	62080228	0.000107	3.97	15.89
2023BD	SSC	AX-176824157	B06	20836863	7.74e-05	4.11	13.95
2023BD	SSC	AX-147256372	B07	114941438	0.000832	3.08	12.48
2023BD	SSC	AX-176817865	B07	108171253	0.000785	3.11	12.57
2023BD	SSC	AX-177639160	B07	111225020	0.000785	3.11	12.57
2023BD	SSC	AX-177640158	B07	11336880	0.000575	3.24	13.07
2023BD	SSC	AX-176817811	B07	12045906	0.000409	3.39	11.03
2023BD	SSC	AX-177643535	B08	58829383	0.000882	3.05	12.51
2023BD	SSC	AX-177641154	B08	76311102	0.000864	3.06	12.53
2023BD	SSC	AX-177642614	B08	48638573	0.000843	3.07	12.45
2023BD	SSC	AX-177640763	B08	52489544	0.000843	3.07	12.45
2023BD	SSC	AX-177642802	B08	52508661	0.000843	3.07	12.45
2023BD	SSC	AX-177642510	B08	62667608	0.000843	3.07	12.45
2023BD	SSC	AX-177643384	B08	65564951	0.000843	3.07	12.45
2023BD	SSC	AX-177644196	B08	70335282	0.000843	3.07	12.45
2023BD	SSC	AX-177642511	B08	76108086	0.000843	3.07	12.45
2023BD	SSC	AX-177643519	B08	84623867	0.000843	3.07	12.45
2023BD	SSC	AX-177643214	B08	88281534	0.000843	3.07	12.45
2023BD	SSC	AX-177641247	B08	90057402	0.000843	3.07	12.45
2023BD	SSC	AX-177642684	B08	92092344	0.000843	3.07	12.45
2023BD	SSC	AX-177642696	B08	79833882	0.00079	3.1	12.62
2023BD	SSC	AX-177638850	B08	27804899	0.000742	3.13	12.76
2023BD	SSC	AX-177643747	B08	69906602	0.000738	3.13	12.47
2023BD	SSC	AX-177644346	B08	60575565	0.000696	3.16	13.17
2023BD	SSC	AX-177641779	B08	61510466	0.000696	3.16	13.17
2023BD	SSC	AX-177642686	B08	55544984	0.000647	3.19	13.3
2023BD	SSC	AX-177643754	B08	24502547	0.000636	3.2	13.19
2023BD	SSC	AX-177643143	B08	35872560	0.000636	3.2	13.19
2023BD	SSC	AX-177643231	B08	89687755	0.000636	3.2	13.19
2023BD	SSC	AX-177642981	B08	60093217	0.000614	3.21	13.51
2023BD	SSC	AX-177641476	B08	44384378	0.000581	3.24	13.27
2023BD	SSC	AX-177642925	B08	43717022	0.000563	3.25	13.27
2023BD	SSC	AX-177641062	B08	53965612	0.000537	3.27	13.65
2023BD	SSC	AX-177643609	B08	28074347	0.000526	3.28	13.22
2023BD	SSC	AX-177643999	B08	28302798	0.000526	3.28	13.22
2023BD	SSC	AX-177638137	B08	30211960	0.000526	3.28	13.22
2023BD	SSC	AX-177642396	B08	31666764	0.000526	3.28	13.22
2023BD	SSC	AX-147258162	B08	33923788	0.000526	3.28	13.22
2023BD	SSC	AX-177644118	B08	33941677	0.000526	3.28	13.22
2023BD	SSC	AX-147258183	B08	34825243	0.000526	3.28	13.22
2023BD	SSC	AX-177643229	B08	42320913	0.000526	3.28	13.22
2023BD	SSC	AX-177644134	B08	45841512	0.000526	3.28	13.22
2023BD	SSC	AX-177643776	B08	46904406	0.000526	3.28	13.22
2023BD	SSC	AX-177641925	B08	48479205	0.000526	3.28	13.22
2023BD	SSC	AX-177642977	B08	53994712	0.000526	3.28	13.22
2023BD	SSC	AX-177642612	B08	60998139	0.000481	3.32	13.52
2023BD	SSC	AX-177642562	B08	34994096	0.000394	3.4	13.97
2023BD	SSC	AX-147257290	B08	3772142	0.00032	3.49	14.31
2023BD	SSC	AX-176820563	B08	117700502	0.000256	3.59	14.51
2023BD	SSC	AX-176819190	B09	143327266	0.000789	3.1	10.02
2023BD	SSC	AX-177643558	B09	143219105	0.000114	3.94	15.63
2023BD	SSC	AX-177643888	B09	143317193	0.000114	3.94	15.63
2023BD	SSC	AX-177643947	B09	143217495	2.97e-05	4.53	15.18
2021BD	SC	AX-176795676	A01	28691028	0.000199	3.7	12.18
2021BD	SC	AX-176800983	A01	68669457	0.000203	3.69	12.3
2021BD	SC	AX-176801211	A01	44758165	0.000776	3.11	9.98
2021BD	SC	AX-176802172	A01	95083257	0.000387	3.41	13.71
2021BD	SC	AX-176803802	A01	85376768	4.32e-05	4.36	14.36
2021BD	SC	AX-176804053	A01	76085865	9.44e-05	4.02	13.57
2021BD	SC	AX-176808119	A01	22610118	3.03e-05	4.52	14.89
2021BD	SC	AX-176815895	A01	12471832	0.000425	3.37	10.83
2021BD	SC	AX-176818277	A01	21927748	0.000693	3.16	10.4
2021BD	SC	AX-176823248	A01	26162449	1.2e-05	4.92	18.95
2021BD	SC	AX-176793532	A05	86244003	0.000927	3.03	12.23
2021BD	SC	AX-176794050	A05	90762238	1.09e-05	4.96	19.42
2021BD	SC	AX-176798082	A05	91531775	7.11e-05	4.15	16.28
2021BD	SC	AX-176799623	A05	86491779	0.000722	3.14	12.86
2021BD	SC	AX-176802527	A05	89861702	1.57e-05	4.81	18.56
2021BD	SC	AX-176807109	A05	91758105	4.77e-06	5.32	20.29
2021BD	SC	AX-176812076	A05	90192055	1.61e-05	4.79	18.61
2021BD	SC	AX-176813575	A05	87246462	0.000296	3.53	11.67
2021BD	SC	AX-176814806	A05	13918345	0.000998	3	9.6
2021BD	SC	AX-176814936	A05	90223801	1.57e-05	4.81	18.56
2021BD	SC	AX-177640245	A07	6715265	0.000877	3.06	12.32
2021BD	SC	AX-147236064	A10	68025498	1.62e-05	4.79	18.83
2021BD	SC	AX-176821262	B01	52310515	0.000113	3.95	13.12
2021BD	SC	AX-147250836	B05	141112295	0.000713	3.15	12.65
2021BD	SC	AX-176819996	B05	141909260	0.000722	3.14	12.86
2021BD	SC	AX-176820713	B05	139680447	0.00097	3.01	12.16
2021BD	SC	AX-176822721	B05	137175471	7.11e-05	4.15	16.28
2021BD	SC	AX-176820626	B06	129840908	0.000136	3.86	12.64
2021BD	SC	AX-176823824	B06	16269413	0.000136	3.86	12.64
2021BD	SC	AX-147254740	B07	5409168	3.23e-05	4.49	17.47
2021BD	SC	AX-177643114	B08	111289082	0.000935	3.03	12.22
2021BD	SC	AX-177644567	B08	118050190	1.57e-05	4.81	18.56
2021BD	SC	AX-176823322	B09	97992691	0.000136	3.86	12.64
2021BD	SC	AX-177637912	B09	127505752	8.48e-05	4.07	13.35
2021BD	SC	AX-177640010	B09	51030060	0.000136	3.86	12.64
2021BD	SC	AX-176792168	B10	111722221	0.000176	3.75	15.11
2021BD	SC	AX-177639819	B10	21762234	0.000136	3.86	12.64
2021BD	SC	AX-177644597	B10	120142048	0.000614	3.21	10.45
2022BD	SC	AX-176795676	A01	28691028	0.000647	3.19	10.15
2022BD	SC	AX-176808119	A01	22610118	0.000533	3.27	10.86
2022BD	SC	AX-176823248	A01	26162449	2.01e-05	4.7	18.58
2022BD	SC	AX-176818389	A04	19587421	0.000937	3.03	12.55
2022BD	SC	AX-147222537	A05	55236469	0.000671	3.17	13.28
2022BD	SC	AX-147222608	A05	71261705	0.000937	3.03	12.55
2022BD	SC	AX-147222614	A05	71299008	0.000572	3.24	13.36
2022BD	SC	AX-176793084	A05	65448751	0.000937	3.03	12.55
2022BD	SC	AX-176793969	A05	61001516	0.000937	3.03	12.55
2022BD	SC	AX-176794050	A05	90762238	0.000276	3.56	14.53
2022BD	SC	AX-176796826	A05	74960322	0.000937	3.03	12.55
2022BD	SC	AX-176800228	A05	54227310	0.000937	3.03	12.55
2022BD	SC	AX-176800818	A05	71494830	0.000937	3.03	12.55
2022BD	SC	AX-176800919	A05	48845453	0.000937	3.03	12.55
2022BD	SC	AX-176800985	A05	65680010	0.000937	3.03	12.55
2022BD	SC	AX-176801558	A05	50849644	0.000937	3.03	12.55
2022BD	SC	AX-176802527	A05	89861702	0.000276	3.56	14.53
2022BD	SC	AX-176802706	A05	88300080	0.000796	3.1	10.23
2022BD	SC	AX-176803087	A05	62175549	0.000937	3.03	12.55
2022BD	SC	AX-176803756	A05	65763441	0.000937	3.03	12.55
2022BD	SC	AX-176804452	A05	58616691	0.000937	3.03	12.55
2022BD	SC	AX-176804571	A05	54262404	0.000937	3.03	12.55
2022BD	SC	AX-176805092	A05	58414998	0.000551	3.26	13.34
2022BD	SC	AX-176807109	A05	91758105	3.46e-05	4.46	17.76
2022BD	SC	AX-176807365	A05	46609312	0.000937	3.03	12.55
2022BD	SC	AX-176807990	A05	54844625	0.000937	3.03	12.55
2022BD	SC	AX-176808805	A05	68938174	0.000937	3.03	12.55
2022BD	SC	AX-176811438	A05	54184013	0.000937	3.03	12.55
2022BD	SC	AX-176811992	A05	68938664	0.000937	3.03	12.55
2022BD	SC	AX-176812076	A05	90192055	0.000299	3.52	14.48
2022BD	SC	AX-176813575	A05	87246462	0.000939	3.03	10.35
2022BD	SC	AX-176814866	A05	70977573	0.000937	3.03	12.55
2022BD	SC	AX-176814937	A05	90223801	0.000276	3.56	14.53
2022BD	SC	AX-176816183	A05	81419650	0.000937	3.03	12.55
2022BD	SC	AX-176802969	A06	1418920	0.000705	3.15	13.01
2022BD	SC	AX-177639697	A07	7202824	0.00081	3.09	12.89
2022BD	SC	AX-177640245	A07	6715265	0.000594	3.23	13.29
2022BD	SC	AX-147236064	A10	68025498	0.000271	3.57	14.56
2022BD	SC	AX-176797012	B04	5934631	0.000797	3.1	12.81
2022BD	SC	AX-176820713	B05	139680447	0.000421	3.38	11.23
2022BD	SC	AX-176823460	B05	1870301	0.000937	3.03	12.55
2022BD	SC	AX-176818522	B06	2030071	0.000468	3.33	13.68
2022BD	SC	AX-176819623	B06	21311978	0.000705	3.15	13.01
2022BD	SC	AX-147258162	B08	33923788	0.00094	3.03	12.54
2022BD	SC	AX-147258183	B08	34825243	0.00094	3.03	12.54
2022BD	SC	AX-176791323	B08	27002771	0.000418	3.38	11.34
2022BD	SC	AX-176820041	B08	19234772	0.000937	3.03	12.55
2022BD	SC	AX-177637374	B08	24535342	0.000457	3.34	11.1
2022BD	SC	AX-177638094	B08	27803886	0.000277	3.56	12.02
2022BD	SC	AX-177638137	B08	30211960	0.00094	3.03	12.54
2022BD	SC	AX-177638850	B08	27804899	0.00094	3.03	12.54
2022BD	SC	AX-177641925	B08	48479205	0.00094	3.03	12.54
2022BD	SC	AX-177642263	B08	125505318	0.000355	3.45	11.49
2022BD	SC	AX-177642396	B08	31666764	0.00094	3.03	12.54
2022BD	SC	AX-177642562	B08	34994096	0.00094	3.03	12.54
2022BD	SC	AX-177642612	B08	60998139	0.000922	3.04	12.81
2022BD	SC	AX-177642627	B08	45454253	0.000418	3.38	11.34
2022BD	SC	AX-177642766	B08	42878102	0.000788	3.1	13.29
2022BD	SC	AX-177642977	B08	53994712	0.00094	3.03	12.54
2022BD	SC	AX-177643114	B08	111289082	0.000288	3.54	14.46
2022BD	SC	AX-177643229	B08	42320913	0.00094	3.03	12.54
2022BD	SC	AX-177643254	B08	28637514	0.000211	3.67	12.56
2022BD	SC	AX-177643609	B08	28074347	0.00094	3.03	12.54
2022BD	SC	AX-177643776	B08	46904406	0.00094	3.03	12.54
2022BD	SC	AX-177643999	B08	28302798	0.00094	3.03	12.54
2022BD	SC	AX-177644118	B08	33941677	0.00094	3.03	12.54
2022BD	SC	AX-177644134	B08	45841512	0.00094	3.03	12.54
2022BD	SC	AX-177644567	B08	118050190	0.000276	3.56	14.53
2022BD	SC	AX-177637912	B09	127505752	0.000296	3.53	11.78
2022BD	SC	AX-176792168	B10	111722221	0.000535	3.27	13.62
2023BD	SC	AX-176808119	A01	22610118	0.000842	3.07	10.08
2023BD	SC	AX-176823248	A01	26162449	0.000611	3.21	13.18
2023BD	SC	AX-176807109	A05	91758105	0.000138	3.86	15.57
2023BD	SC	AX-176820713	B05	139680447	0.000869	3.06	10.03
2023BD	SC	AX-177637912	B09	127505752	0.000412	3.38	11.2
2023BD	SC	AX-147217615	A03	118257901	8.03e-05	4.1	16.56
2023BD	SC	AX-176791323	B08	27002771	0.000655	3.18	10.66
2023BD	SC	AX-177637374	B08	24535342	0.000787	3.1	10.19
2023BD	SC	AX-177638094	B08	27803886	0.000624	3.2	10.55
2023BD	SC	AX-177642263	B08	125505318	0.000209	3.68	12.25
2023BD	SC	AX-177642627	B08	45454253	0.000828	3.08	10.21
2023BD	SC	AX-177643114	B08	111289082	0.000487	3.31	13.55
2023BD	SC	AX-177643254	B08	28637514	0.000356	3.45	11.7
2023BD	SC	AX-147214849	A02	85968856	0.000393	3.41	13.96
2023BD	SC	AX-147234743	A09	118600614	0.000181	3.74	15.14
2023BD	SC	AX-147245026	B03	111893493	0.000187	3.73	15.09
2023BD	SC	AX-147245084	B03	114934705	0.000141	3.85	15.54
2023BD	SC	AX-176795787	B03	121078994	0.000152	3.82	15.56
2023BD	SC	AX-176796623	A03	111286594	0.000187	3.73	15.09
2023BD	SC	AX-176800122	B03	114451479	0.000105	3.98	16.17
2023BD	SC	AX-176805505	B03	108820416	0.000187	3.73	15.09
2023BD	SC	AX-176805573	B03	108848601	0.000187	3.73	15.09
2023BD	SC	AX-176807178	A05	11685332	0.000976	3.01	10.01
2023BD	SC	AX-176807996	A04	15533403	0.000115	3.94	16.01
2023BD	SC	AX-176808039	B03	117920877	0.000187	3.73	15.09
2023BD	SC	AX-176808874	B03	106223932	0.000657	3.18	10.47
2023BD	SC	AX-176809140	B03	112348375	0.000187	3.73	15.09
2023BD	SC	AX-176810658	A01	94535260	0.000187	3.73	15.09
2023BD	SC	AX-176812416	B03	110280912	0.000419	3.38	13.92
2023BD	SC	AX-176812836	A03	110850153	0.000187	3.73	15.09
2023BD	SC	AX-176813062	A03	119465517	0.000897	3.05	12.59
2023BD	SC	AX-176814446	A03	108913899	6.21e-05	4.21	17.49
2023BD	SC	AX-176815198	A03	118212397	0.000187	3.73	15.09
2023BD	SC	AX-176816968	B03	108307340	0.000187	3.73	15.09
2023BD	SC	AX-176816972	B03	108858663	0.000461	3.34	14.2
2023BD	SC	AX-176816976	B03	111152299	0.000187	3.73	15.09
2023BD	SC	AX-176816982	B03	112972686	0.000522	3.28	13.37
2023BD	SC	AX-176819713	B03	113251004	0.000115	3.94	16.01
2023BD	SC	AX-176823318	B02	99325778	0.000831	3.08	12.77
2023BD	SC	AX-176824157	B06	20836863	0.000901	3.05	10.18

## Sheet: Table S2
Table S2 Pleiotropic SNPs
Environment	Trait	Marker	Chromosome	Position(bp)	P-value	-1og10(p)	R2(%)
2023BD	SSC SC	AX-176810658	A01	94535260	0.000187	3.73	15.09
					0.000798	3.1	12.54
		AX-176796623	A03	111286594	0.000187	3.73	15.09
					0.000798	3.1	12.54
		AX-176812836	A03	110850153	0.000187	3.73	15.09
					0.000798	3.1	12.54
		AX-176814446	A03	108913899	6.21e-05	4.21	17.49
					0.000667	3.18	13.52
		AX-176815198	A03	118212397	0.000187	3.73	15.09
					0.000798	3.1	12.54
		AX-176807996	A04	15533403	0.000115	3.94	16.01
					0.00071	3.15	12.86
		AX-147234743	A09	118600614	0.000775	3.11	12.59
					0.000181	3.74	15.14
		AX-147245084	B03	114934705	0.000141	3.85	15.54
					0.000652	3.19	12.87
		AX-176800122	B03	114451479	0.000105	3.98	16.17
					0.000427	3.37	13.63
		AX-176805505	B03	108820416	0.000187	3.73	15.09
					0.000798	3.1	12.54
		AX-176805573	B03	108848601	0.000187	3.73	15.09
					0.000798	3.1	12.54
		AX-147245026	B03	111893493	0.000187	3.73	15.09
					0.000798	3.1	12.54
		AX-176808039	B03	117920877	0.000187	3.73	15.09
					0.000798	3.1	12.54
		AX-176809140	B03	112348375	0.000187	3.73	15.09
					0.000798	3.1	12.54
		AX-176816968	B03	108307340	0.000187	3.73	15.09
					0.000798	3.1	12.54
		AX-176816976	B03	111152299	0.000187	3.73	15.09
					0.000798	3.1	12.54
		AX-176816982	B03	112972686	0.000522	3.28	13.37
					0.000946	3.02	12.5
		AX-176819713	B03	113251004	0.000115	3.94	16.01
					0.00071	3.15	12.86
		AX-176824157	B06	20836863	0.000901	3.05	10.18
					7.74e-05	4.11	13.95
2023BD	TSC SC	AX-147214849	A02	85968856	0.000393	3.41	13.96
					0.000906	3.04	14.24
		AX-177642263	B08	125505318	0.000209	3.68	12.25
					0.00101	3	10.84

## Sheet: Table S3
Table S3 SNPs with co-localization across multiple environments
Environment	Trait	Marker	Chromosome	Position(bp)	P-value	-1og10(p)	R2(%)
2021BD 2022BD	SC	AX-176795676	A01	28691028	0.000199	3.7	12.18
					0.000647	3.19	10.15
		AX-176794050	A05	90762238	1.09e-05	4.96	19.42
					0.000276	3.56	14.53
		AX-176812076	A05	90192055	1.61e-05	4.79	18.61
					0.000299	3.52	14.48
		AX-176813575	A05	87246462	0.000296	3.53	11.67
					0.000939	3.03	10.35
		AX-176802527	A05	89861702	0.000276	3.56	14.53
		AX-176802527	A05	89861702	1.57e-05	4.81	18.56
		AX-177640245	A07	6715265	0.000877	3.06	12.32
					0.000594	3.23	13.29
		AX-147236064	A10	68025498	1.62e-05	4.79	18.83
					0.000271	3.57	14.56
		AX-177644567	B08	118050190	1.57e-05	4.81	18.56
					0.000276	3.56	14.53
		AX-176792168	B10	111722221	0.000176	3.75	15.11
					0.000535	3.27	13.62
2022BD 2023BD	SC	AX-176791323	B08	27002771	0.000418	3.38	11.34
					0.000655	3.18	10.66
		AX-177637374	B08	24535342	0.000457	3.34	11.1
					0.000787	3.1	10.19
		AX-177638094	B08	27803886	0.000277	3.56	12.02
					0.000624	3.2	10.55
		AX-177642263	B08	125505318	0.000355	3.45	11.49
					0.000209	3.68	12.25
		AX-177642627	B08	45454253	0.000418	3.38	11.34
					0.000828	3.08	10.21
		AX-177643254	B08	28637514	0.000211	3.67	12.56
					0.000356	3.45	11.7
2021BD 2022BD 2023BD	SC	AX-176808119	A01	22610118	3.03e-05	4.52	14.89
					0.000533	3.27	10.86
					0.000842	3.07	10.08
		AX-176823248	A01	26162449	1.2e-05	4.92	18.95
					2.01e-05	4.7	18.58
					0.000611	3.21	13.18
		AX-176807109	A05	91758105	4.77e-06	5.32	20.29
					3.46e-05	4.46	17.76
					0.000138	3.86	15.57
		AX-176820713	B05	139680447	0.00097	3.01	12.16
					0.000421	3.38	11.23
					0.000869	3.06	10.03
		AX-177643114	B08	111289082	0.000935	3.03	12.22
					0.000288	3.54	14.46
					0.000487	3.31	13.55
		AX-177637912	B09		8.48e-05	4.07	13.35
				111289082	0.000296	3.53	11.78
					0.000412	3.38	11.2

## Sheet: Table S4
Table S4 Statistical Results of Genotypes and sucrose content in Peanut Seed Kernels for Each Material
Material Number	Genotype	Sucrose Content (%)
A-007	A/A	6.84
A-011	A/A	5.95
A-014	A/A	5.82
A-016	A/A	6.23
A-018	A/A	5.45
A-028	A/A	5.48
A-048	A/A	6.27
A-050	A/A	7.41
A-060	A/A	6.69
A-065	A/A	6.07
A-074	A/A	6.45
A-093	A/A	7.82
A-099	A/A	5.53
A-110	A/A	6.7
A-111	A/A	7.51
A-118	A/A	5.77
A-002	G/G	3.14
A-021	G/G	3.23
A-023	G/G	2.03
A-026	G/G	3.33
A-030	G/G	3.45
A-038	G/G	3.64
A-040	G/G	3.13
A-069	G/G	3.45
A-072	G/G	2.58
A-075	G/G	3.47
A-079	G/G	3.1
A-083	G/G	3.22
A-087	G/G	3.5
A-091	G/G	2.93
A-097	G/G	3.67
